# Supplementary material for: Carboxymethyl cellulose-templated synthesis of hierarchically structured metal oxides
Source: Royal Society of Chemistry journal article supplement (doi:10.1039/c5gc01348h), 2015-01-01
Supplement: c5gc01348h1.pdf [file c5gc01348h1.pdf]

## Electronic Supplementary Information

### Carboxymethyl cellulose-templated synthesis of hierarchically structured metal oxides

*Jong Wan Ko, Byung Il Lee, You Jung Chung, Chan Beum Park\**

Department of Materials Science and Engineering, Korea Advanced Institute of Science and Technology (KAIST), 335 Science Road, Daejeon 305-701, Republic of Korea

#### Experimental Details

**Materials:**  $\text{CeCl}_3 \cdot 7\text{H}_2\text{O}$  (trace metal basis, 99.9%),  $\text{Ca}(\text{NO}_3)_2 \cdot 4\text{H}_2\text{O}$  (99.0%),  $\text{Mn}(\text{NO}_3)_2 \cdot 4\text{H}_2\text{O}$  (purum p.a., > 97.0%), carboxymethyl cellulose (fibers), ZnO nanoparticles (< 50 nm), and other reagents were purchased from Sigma-Aldrich (St. Louis, USA) and used without purification.

**Preparation of  $\text{CeO}_2$  fibers:** For synthesis of  $\text{CeO}_2$  fibers, 2 g of carboxymethyl cellulose (CMC) was immersed in 50 ml of different concentrations of  $\text{CeCl}_3 \cdot 7\text{H}_2\text{O}$  solution (1 ~ 4 mM). After 30 minutes of incubation under ambient condition, CMC was separated, washed with deionized water, and calcinated at different temperatures (800 ~ 1000 °C) for 2 hours.

**Synthesis of ZnO fibers:** ZnO fibers was prepared 5 g of CMC and 50 ml of  $\text{Zn}(\text{NO}_3)_2 \cdot 6\text{H}_2\text{O}$  solution (0.2 mM). Mixture solution was incubated under ambient condition for 30 minutes. The CMC was separated, washed with deionized water and calcinated at 500 °C for 2 hours.

**Preparation of  $\text{CaMn}_2\text{O}_4$  fibers:**  $\text{CaMn}_2\text{O}_4$  fibers were prepared with a different amount of CMC (0.05 ~ 4 g) and a solution of 40 ml of  $\text{Ca}(\text{NO}_3)_2 \cdot 4\text{H}_2\text{O}$  (25 mM) and  $\text{Mn}(\text{NO}_3)_2 \cdot 4\text{H}_2\text{O}$  (62.5 mM).  $\text{CaMn}_2\text{O}_4$  fibers were obtained by calcinating CMC at 1000 °C under air atmosphere for 2 hours.

**Synthesis of g- $\text{C}_3\text{N}_4$  powder:** g- $\text{C}_3\text{N}_4$  was prepared according to the previous literature. Briefly, 3 g of dicyandiamide in alumina crucible was calcinated at 600 °C under air for 4 hours.

*Characterization:* The morphologies of each sample were observed using a S-4800 field emission scanning electron microscopy (Hitachi Co., Japan) at an electron acceleration voltage of 5 ~ 10 kV. The X-ray diffraction patterns were recorded using a D/MAX-RB X-ray diffractometer (Rigaku Co., Japan) with a scan rate of 4 °/min, range of 10 ° ~ 70 °, and a Cu K $\alpha$  radiation wavelength of 1.5418 Å. Absorbance spectra were obtained using a UV-visible spectrophotometer (Jasco Inc., Japan) with a diffuse-reflectance mode. The mass change as a function of temperature in the isothermal mode was measured using a Setsys 16/18 thermal analyzer (Setaram, France) with a heating rate of 10 °C/min and a temperature range of 25 ~ 800 °C under air. The surface charges of Ce<sup>3+</sup>-CMC fibers dispersion in deionized water at pH 7.0 were investigated by zeta-potential measurements using a Zetasizer nano zs (Malvern, UK). The FT-IR spectra of Ce<sup>3+</sup>-CMC fibers, HCl and NaOH treated CMC fibers were obtained using a FT-IR 200 spectrophotometer (Jasco Inc., Japan). The amount of adsorbed metal ions in CMC fibers was measured using an Agilent ICP-MS 7700S inductively coupled with a plasma mass spectrometer (Agilent, USA). A spectrofluorometric study was conducted using an RF-5301PC (Shimadzu Co., Japan) with an excitation wavelength of 320 nm. X-ray photoelectron spectroscopic analysis was carried out using a K-alpha (Thermo VG Scientific, UK) in the range of 0 – 1300 eV. We measured pore size and surface area of CeO<sub>2</sub> fibers by Brunauer-Emmett-Teller (BET) method using ASAP 2020 N<sub>2</sub> gas sorption analyzer (Micromeritics, USA).

*Methylene blue (MB) degradation test:* A reactive solution was prepared by mixing 30 mg of CeO<sub>2</sub> samples (CeO<sub>2</sub> fibers and bulk CeO<sub>2</sub>) in a 30 mL of MB solution (26.7 µM). The reactive solution was incubated and stabilized in the dark for 4 hours with vigorous stirring to complete the equilibrium of adsorption-desorption of MB molecules on the surface of CeO<sub>2</sub> samples before visible light irradiation. The solution was irradiated by a xenon lamp (450 W)

with a 420 nm cut-off filter. To analyze the degree of MB degradation, the absorbance of the reaction solution at 665 nm was measured after removing CeO<sub>2</sub> samples by centrifugation.

*Preparation of g-C<sub>3</sub>N<sub>4</sub>/ZnO nanoparticle and g-C<sub>3</sub>N<sub>4</sub>/ZnO fiber:* Hybridization of g-C<sub>3</sub>N<sub>4</sub> and ZnO was carried out with different amount of g-C<sub>3</sub>N<sub>4</sub>. g-C<sub>3</sub>N<sub>4</sub> were dispersed in DI water by sonication (20 mg in 50 ml). ZnO was also dispersed in DI water (100 mg in 10 ml), and different amounts of g-C<sub>3</sub>N<sub>4</sub> (1, 3, 5, and 10 wt% of g-C<sub>3</sub>N<sub>4</sub>) were added to the ZnO dispersed aqueous solution. The mixture solution was incubated at 70 °C for overnight to evaporate DI water. We conducted photochemical NADH regeneration with different g-C<sub>3</sub>N<sub>4</sub>/ZnO nanoparticles (fibers) (1, 3, 5, and 10 wt%), and figured out the optimized g-C<sub>3</sub>N<sub>4</sub> content (3 wt%) (data not shown).

*Photochemical nicotineamide adenine dinucleotide (NADH) regeneration and photoenzymatic synthesis of L-glutamate:* The photochemical regeneration of NADH was conducted visible light irradiation with a xenon lamp (450 W) at room temperature. The reaction solution was prepared by dissolving 1 mM of NAD<sup>+</sup> and 250 μM of [Cp\*Rh(bpy)H<sub>2</sub>O]<sup>2+</sup> (**M**) in 3 mL of phosphate buffer (100 mM, pH 7.0) containing 15 w% triethanolamine. ZnO fiber (100 mg), g-C<sub>3</sub>N<sub>4</sub>/ZnO nanoparticles (100 mg), g-C<sub>3</sub>N<sub>4</sub> powder (3 mg), and g-C<sub>3</sub>N<sub>4</sub>/ZnO fibers (100 mg) were dispersed in the reactive solution. The concentration of NADH in reactive solution was measured by analyzing its absorbance at 340 nm using UV-visible spectrophotometer (Jasco Inc., Japan). For the photoenzymatic synthesis of L-glutamate was coupled with photoregeneration of NADH using g-C<sub>3</sub>N<sub>4</sub>/ZnO (100 mg) fiber. The reaction solution for the photoenzymatic reaction consisted of NAD<sup>+</sup> (1 mM), [Cp\*Rh(bpy)H<sub>2</sub>O]<sup>2+</sup> (250 μM), α-ketoglutarate (5 mM), (NH<sub>4</sub>)<sub>2</sub>SO<sub>4</sub> (100 mM) and GDH (40 U) in 3 mL of phosphate buffer (100 mM, pH 7.0) containing 15 w% triethanolamine.

*Photocurrent measurement:* Photo-electrodes were prepared by drop casting of each samples (10 μg) on ITO glass (1 x 1 cm<sup>2</sup>). Photocurrent responses were measured with prepared

photo-electrodes as working electrodes, a platinum wire as a counter electrode, Ag/AgCl reference electrode, and NaSO<sub>4</sub> (0.5 M) solution (as electrolyte) using WMPG 1000 potentiostat (WonATech, Korea). An applied potential for photo-electrodes against Ag/AgCl was set to 0.3 V.

*Electrochemical analysis of CaMn<sub>2</sub>O<sub>4</sub>:* Cyclic voltammetry (CV) was conducted using WMPG 1000 potentiostat (WonATech, Korea) with CaMn<sub>2</sub>O<sub>4</sub> samples-Nafion (40 µg in 20 µL) deposited on glassy carbon electrode as a working electrode, a platinum wire as a counter electrode, and an Ag/AgCl reference electrode. The electrochemical reaction was performed in an O<sub>2</sub> saturated sodium phosphate solution (100 mM, pH 7.0) at room temperature with a scan rate of 50 mV s<sup>-1</sup>.

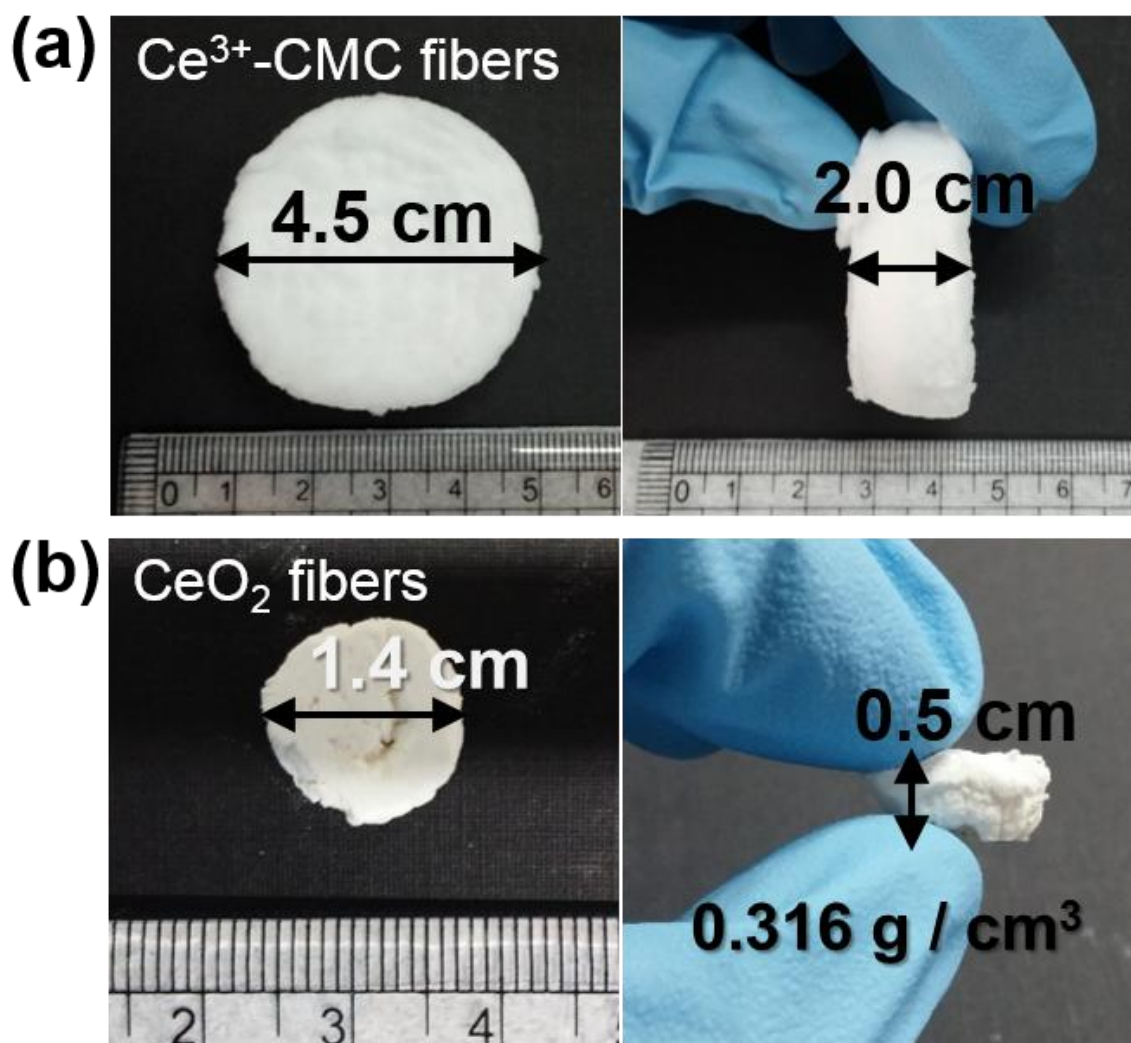

**Figure S1.** Photographs of  $\text{Ce}^{3+}$ -CMC fibers and free-standing  $\text{CeO}_2$  synthesized from  $\text{Ce}^{3+}$ -CMC fibers.

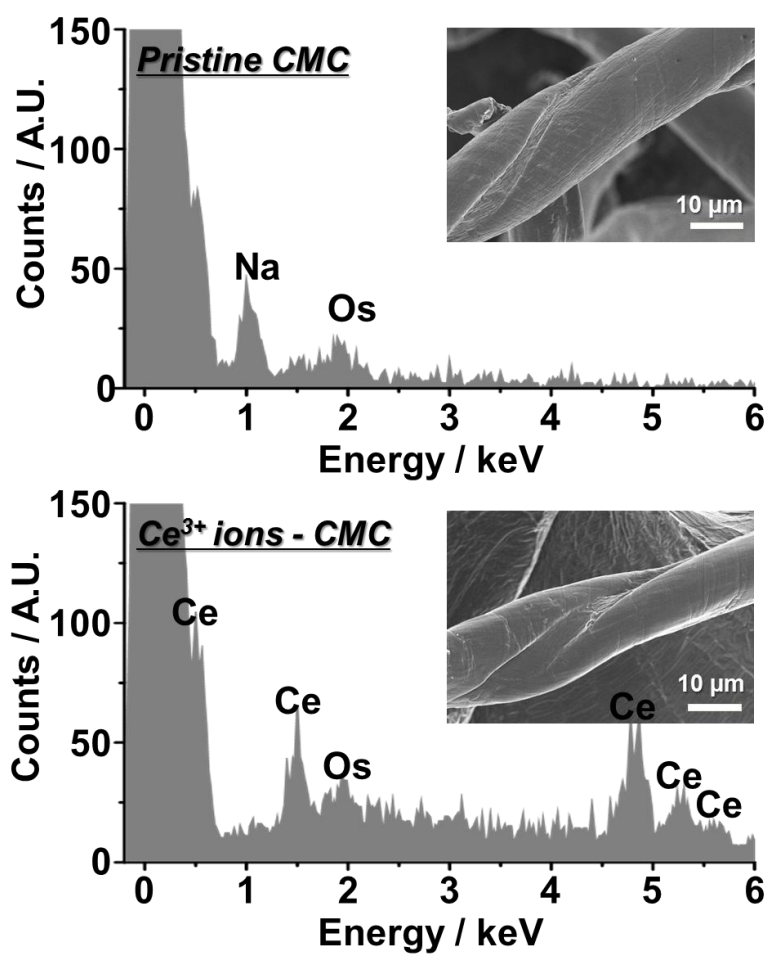

**Figure S2.** Surface analysis by EDX demonstrates that metal ions in the CMC fibers.

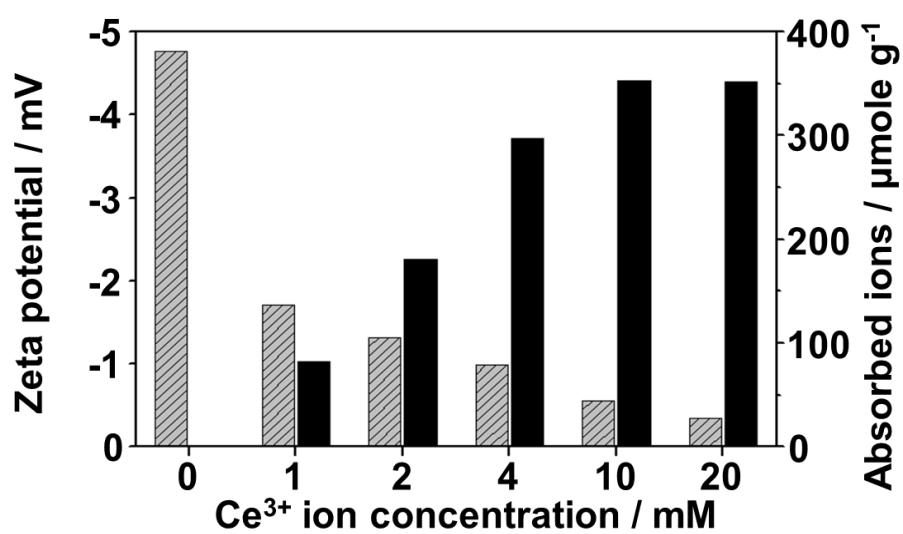

**Figure S3.** Zeta potential analysis of Ce<sup>3+</sup> ion-adopted CMC fibers with the measured amount of Ce<sup>3+</sup> ions in CM-cellulose.

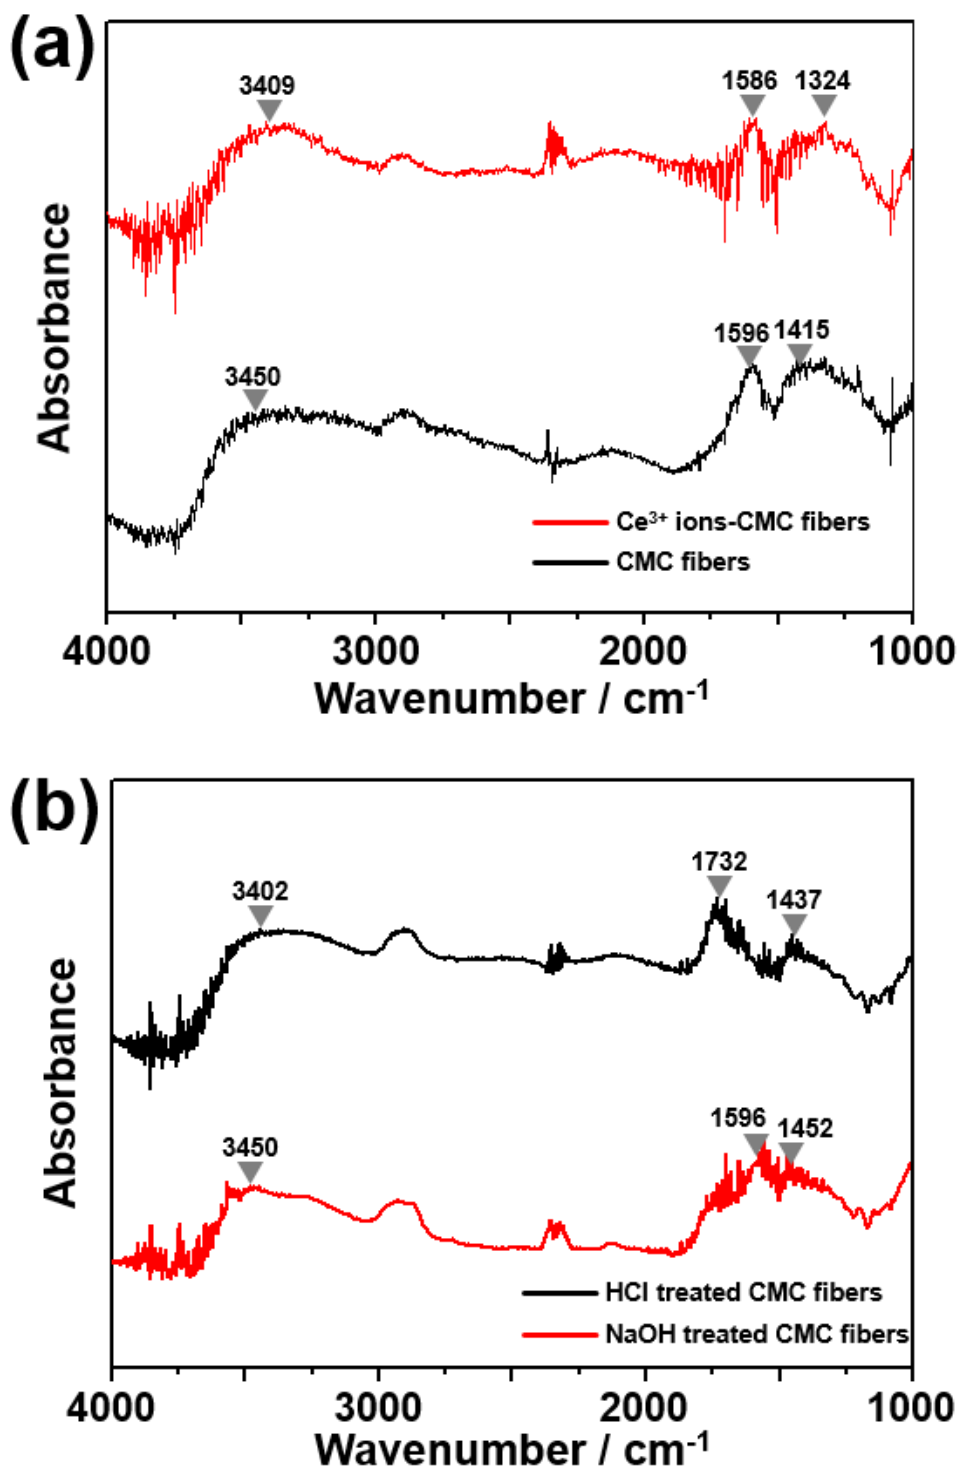

**Figure S4.** (a) FT-IR spectra of pristine CMC fibers and Ce<sup>3+</sup>-CMC fibers. FT-IR absorption peaks corresponding to the stretching vibration modes of hydroxyl groups (~3400 cm<sup>-1</sup>) and carboxyl groups (~1400 cm<sup>-1</sup>). (b) FT-IR spectra of HCl (acid) and NaOH (basic) treated CMC fibers.

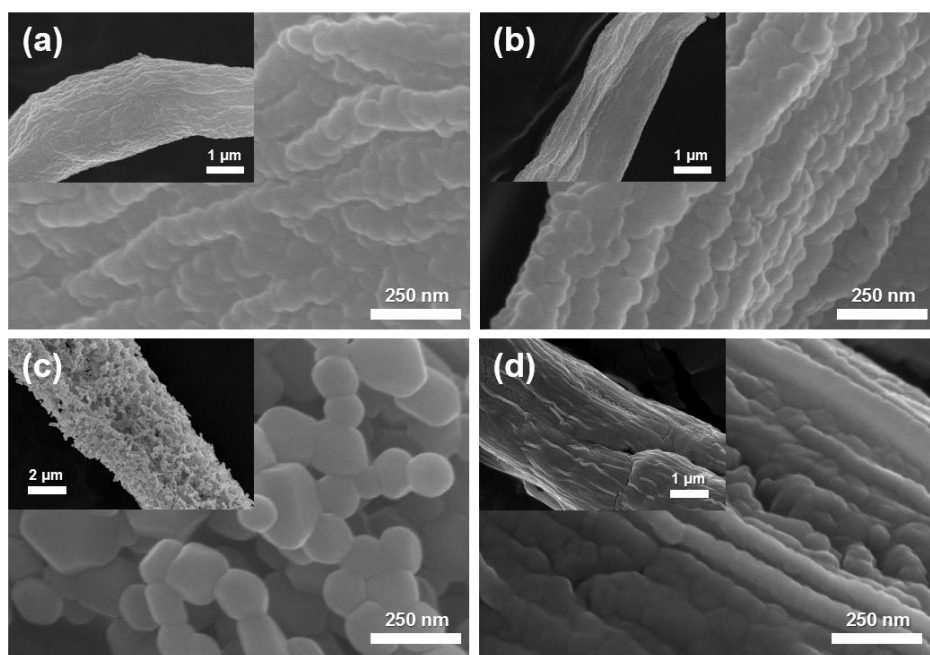

**Figure S5.** SEM images of  $\text{CeO}_2$  fibers synthesized with different conditions [(a) 1 and (b) 4 mM of  $\text{CeCl}_3$  solution and calcination temperature of 800 °C with HCl treated CMC, (b) 1 and (c) 4 mM of  $\text{CeCl}_3$  solution and calcination temperature of 800 °C with NaOH treated CMC].

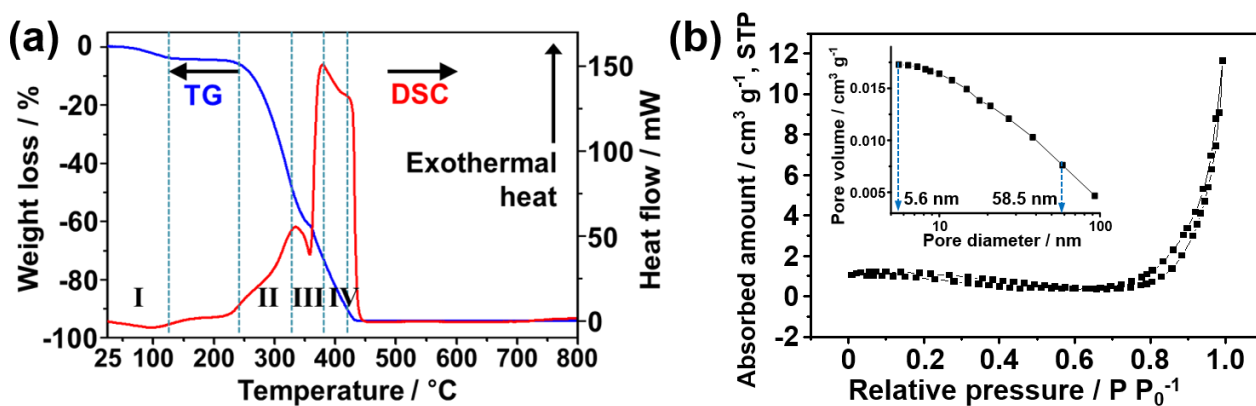

**Figure S6.** (a) Thermogravimetric analysis (TGA) and differential scanning calorimetry (DSC) curves of  $\text{Ce}^{3+}$ -adopted CMC fibers [(I) evaporation of water; (II) decomposition of cellulose fiber; (III) formation of  $\text{CeO}_2$  phase; (IV) burn out of carbon backbone]. (b) Nitrogen adsorption-desorption isotherms and Barrett-Joyner-Halenda (BJH) pore size distribution (inset) of  $\text{CeO}_2$  fibers.



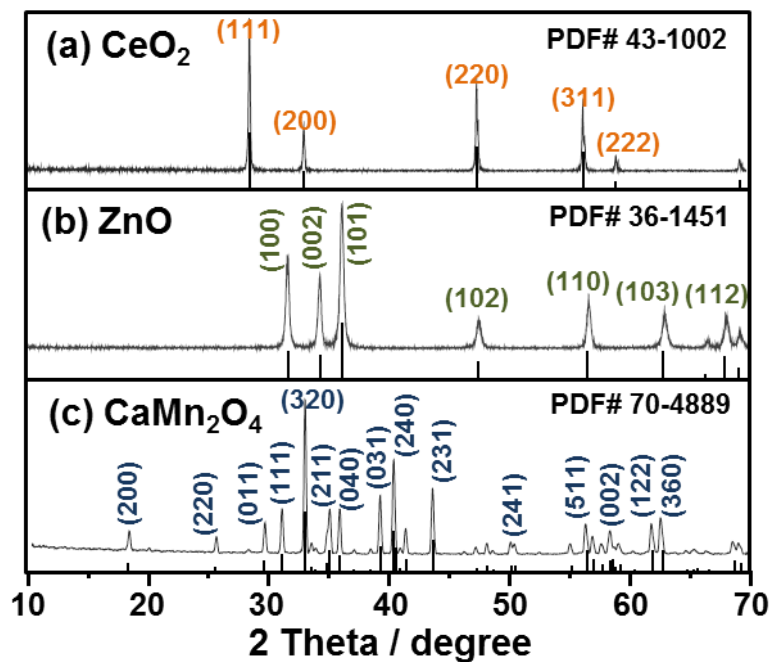

**Figure S7.** XRD spectra of the (a)  $\text{CeO}_2$ , (b)  $\text{ZnO}$ , and (c)  $\text{CaMn}_2\text{O}_4$  fibers.

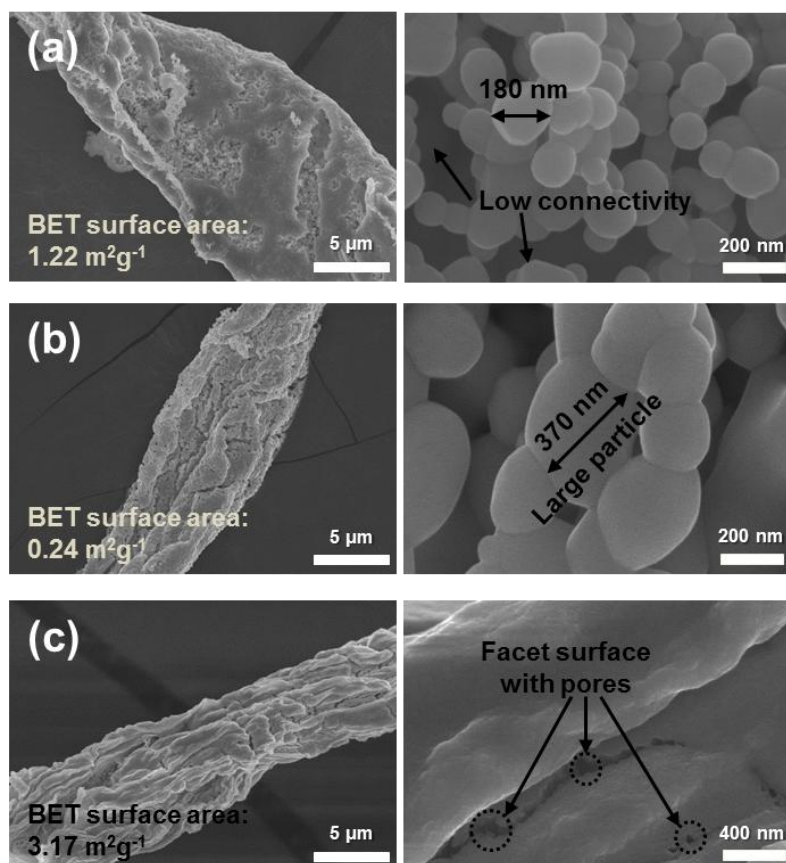

**Figure S8.** SEM images of  $\text{CeO}_2$  fibers synthesized with different conditions [(a) 1 mM of  $\text{CeCl}_3$  solution and calcination temperature of 800 °C, (b) 4 mM of  $\text{CeCl}_3$  solution and calcination temperature of 1000 °C, and (c) 20 mM  $\text{CeCl}_3$  solution with 800 °C calcination temperature].

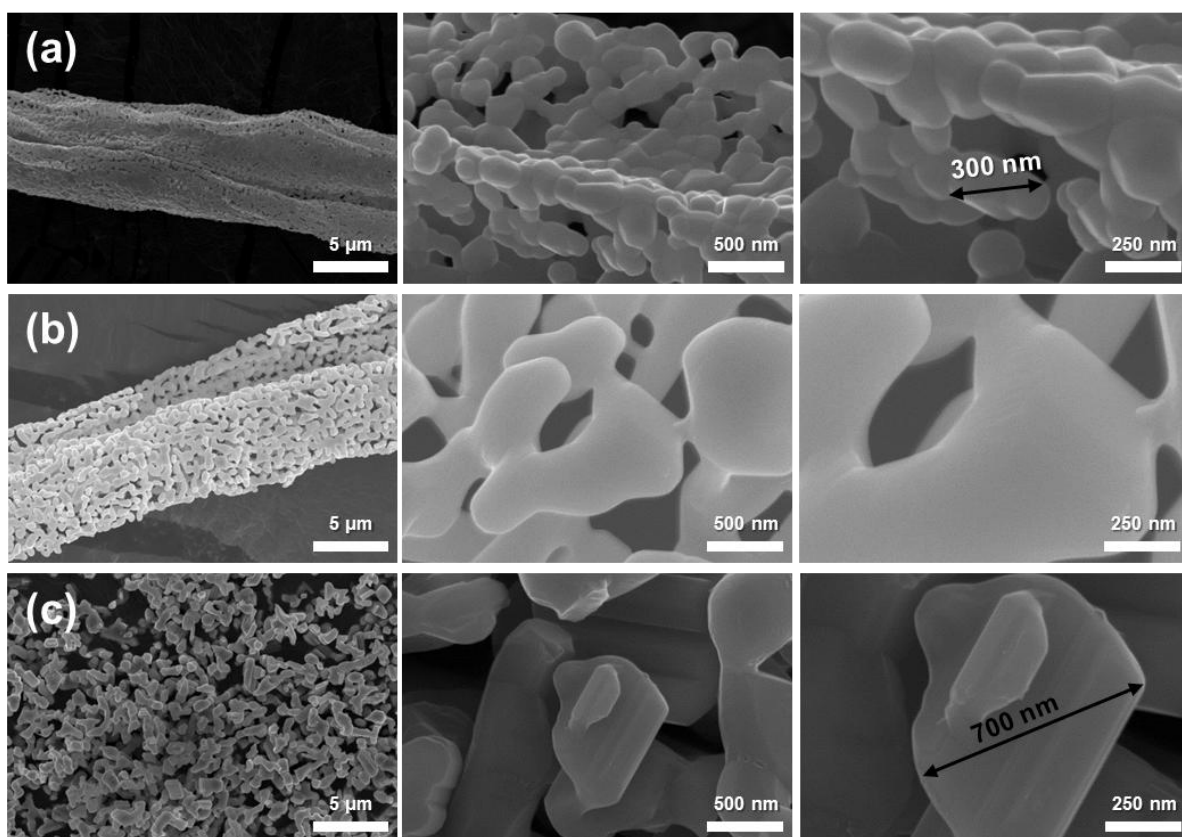

**Figure S9.** SEM images of  $\text{CaMn}_2\text{O}_4$  synthesized with different amount of CM-cellulose; (a) 0.5 g, (b) 4 g, and (c) 6 g under identical experimental condition of precursor concentration and calcination temperature [1 mmole of  $\text{Ca}(\text{NO})_3 \cdot 4\text{H}_2\text{O}$  and 2.5 mmole of  $\text{Mn}(\text{NO})_3 \cdot 4\text{H}_2\text{O}$  in 40 ml of deionized water and calcination temperature of 1000 °C under the air].

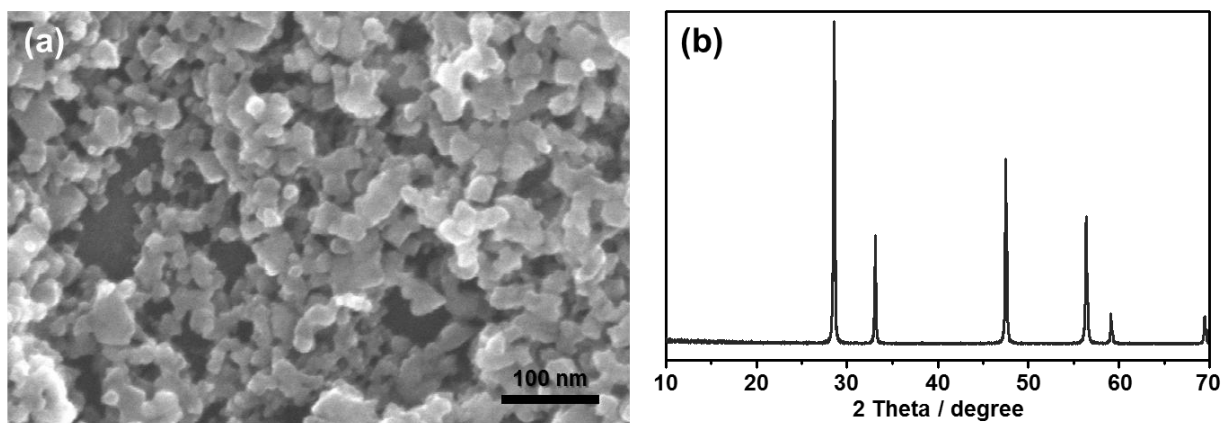

**Figure S10.** (a) SEM image of CeO<sub>2</sub> nanoparticles (purchased from Sigma-Aldrich Co., < 25 nm). (b) XRD spectrum showing the corresponding X-ray diffraction pattern of crystalline CeO<sub>2</sub>.

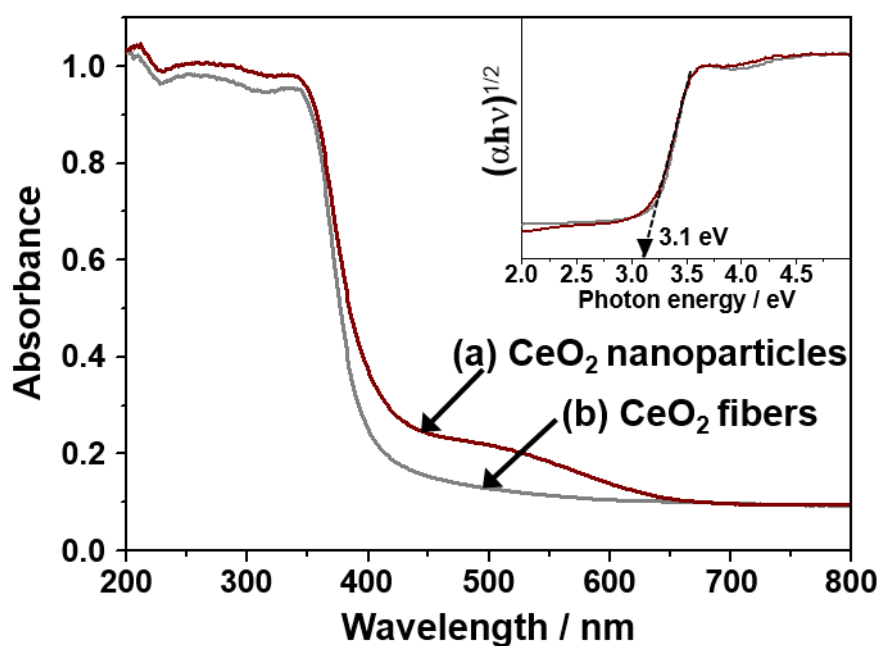

**Figure S11.** UV-visible absorbance spectra of (a) CeO<sub>2</sub> nanoparticles and (b) CeO<sub>2</sub> fibers synthesized using CMC. The inset spectra shows the relationship between the transformed Kubelka-Munk function versus photon energy for CeO<sub>2</sub> samples.

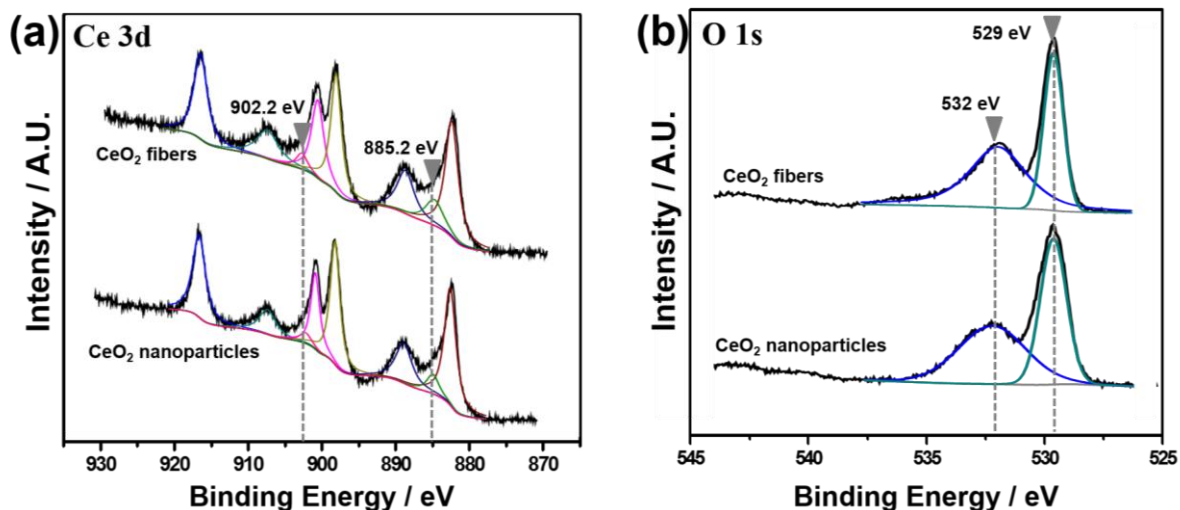

**Figure S12.** XPS spectra of CeO<sub>2</sub> fibers (synthesized with 4 mM of CeCl<sub>3</sub> solution and calcination temperature of 800 °C), and CeO<sub>2</sub> nanoparticles (< 25 nm, purchased from Sigma Aldrich): (A) Ce 3d, and (B) O1s. The concentrations of Ce<sup>3+</sup> ions on the surface of CeO<sub>2</sub> fibers and CeO<sub>2</sub> nanoparticles were calculated as 10.4% and 6.8%, respectively.

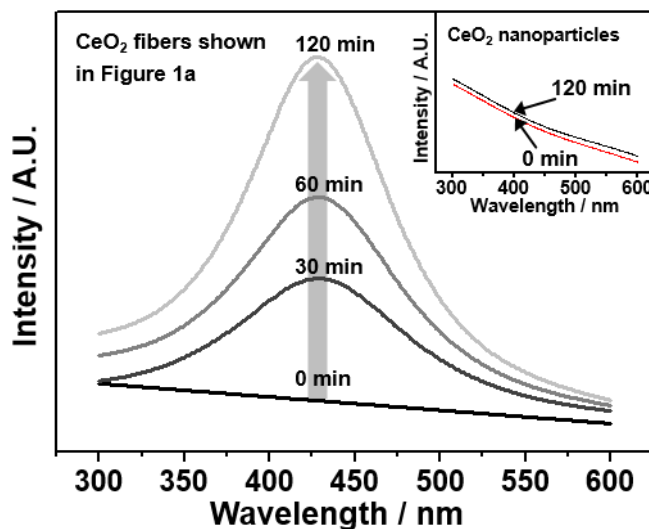

**Figure S13.** Fluorescence spectra of 2-hydroxyl terephthalate (TA-OH') produced by MB and CeO<sub>2</sub> fibers (shown in Figure 1a) during photocatalytic reaction. In the case of CeO<sub>2</sub> nanoparticles, TA-OH' was not generated (inset).

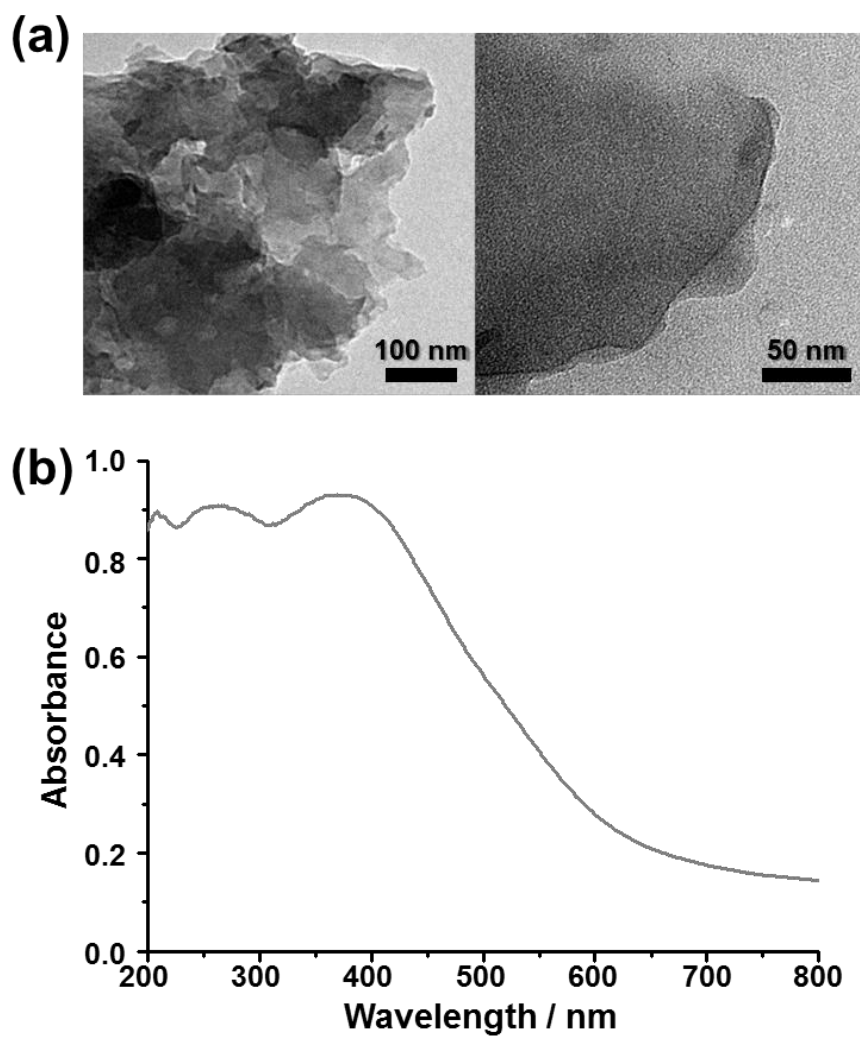

**Figure S14.** Characterizations of prepared g-C<sub>3</sub>N<sub>4</sub> powder using TEM and UV-visible spectrophotometer. (a) TEM images of g-C<sub>3</sub>N<sub>4</sub> powder exhibit a sheet-like two dimensional sheet-like structures in different magnifications. (b) UV-visible spectrum of g-C<sub>3</sub>N<sub>4</sub> powder shows the strong absorption band in the range of 400-600 nm.

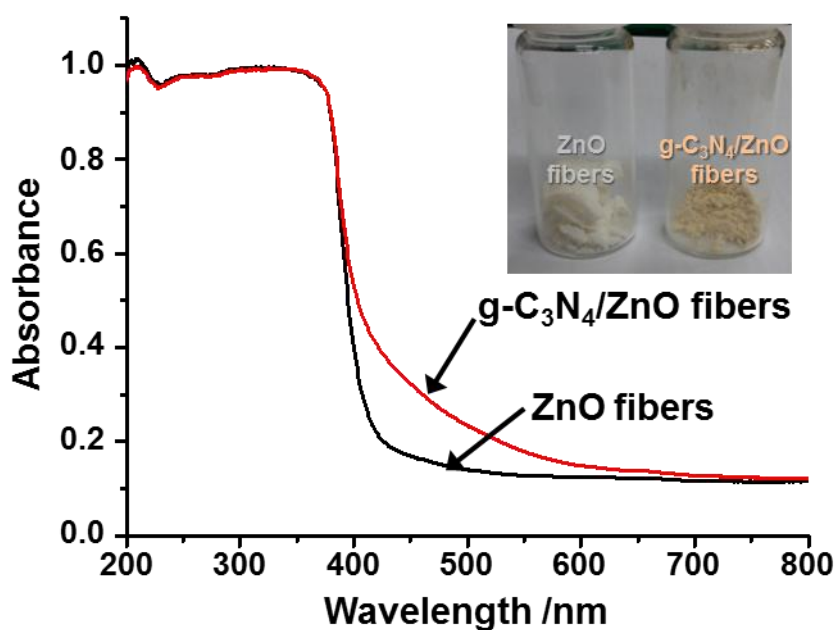

**Figure S15.** DRS spectra of ZnO fibers and g-C<sub>3</sub>N<sub>4</sub>/ZnO fibers, and a photograph of ZnO fibers and g-C<sub>3</sub>N<sub>4</sub>/ZnO fibers (inset). ZnO fiber had no absorbance in the visible light range. [black solid line] After hybridization with g-C<sub>3</sub>N<sub>4</sub>, g-C<sub>3</sub>N<sub>4</sub>/ZnO fibers exhibit increased absorbance in the range of 400-600 nm. [red solid line]

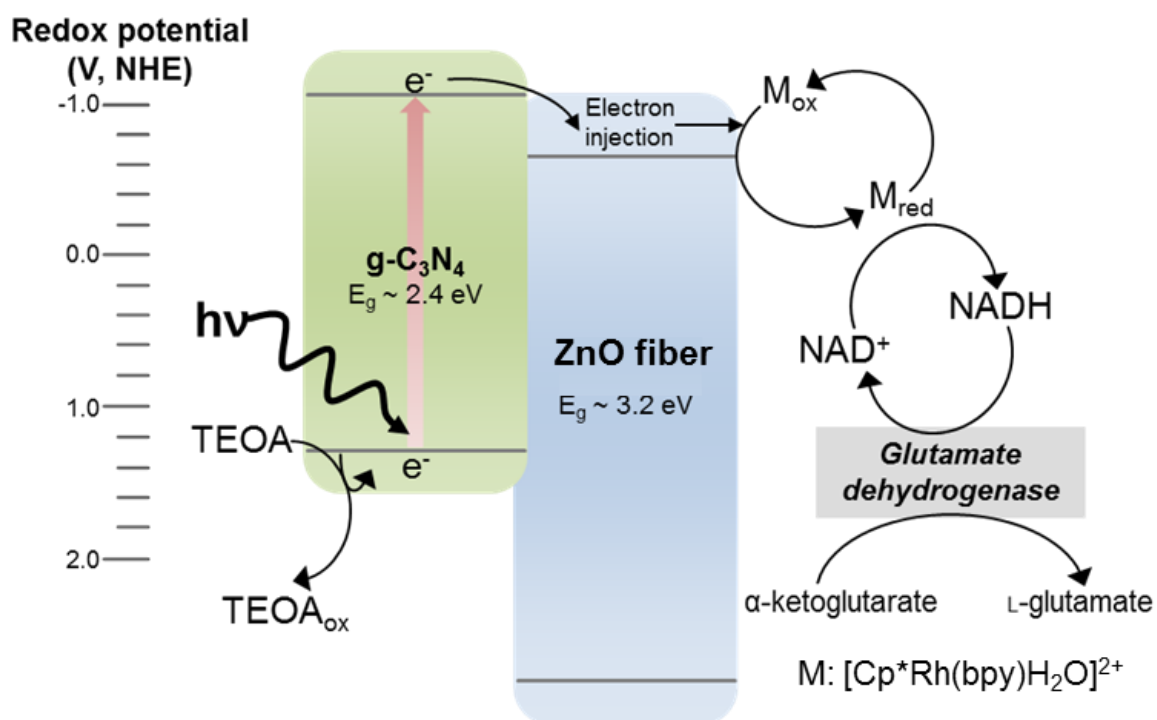

**Figure S16.** Proposed mechanism of an electron transfer between g-C<sub>3</sub>N<sub>4</sub> and ZnO fiber, and photochemical NADH regeneration with g-C<sub>3</sub>N<sub>4</sub>/ZnO fiber through an electron mediator (**M** = [Cp\*Rh(bpy)H<sub>2</sub>O]<sup>2+</sup>).

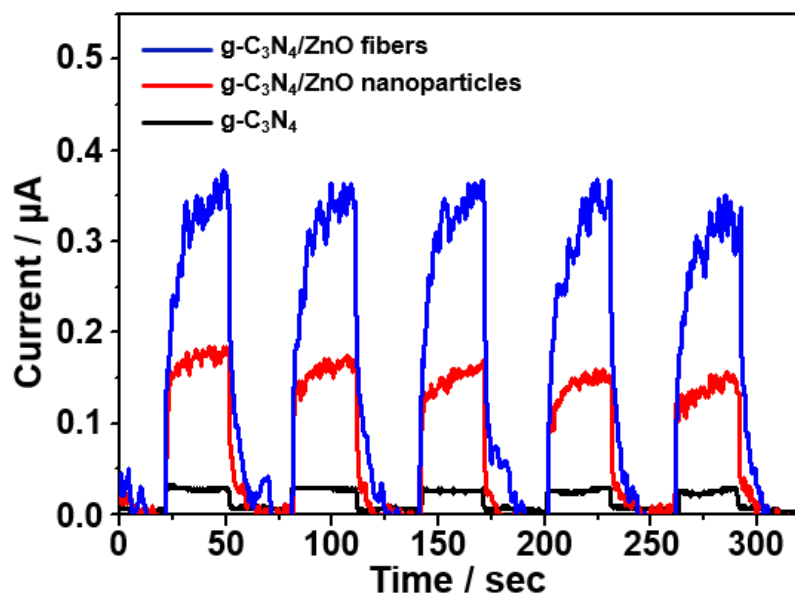

**Figure S17.** Photocurrent response for bare g-C<sub>3</sub>N<sub>4</sub>, g-C<sub>3</sub>N<sub>4</sub>/ZnO nanoparticles, and g-C<sub>3</sub>N<sub>4</sub>/ZnO fibers under visible light irradiation.

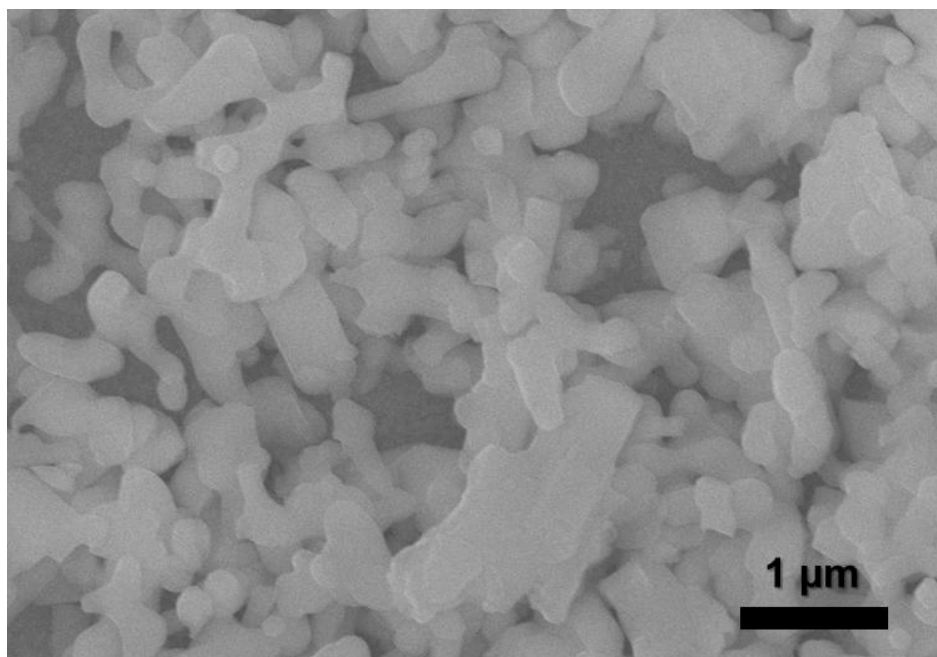

**Figure S18.** SEM image of bulk CaMn<sub>2</sub>O<sub>4</sub> synthesized using conventional hydrothermal method.

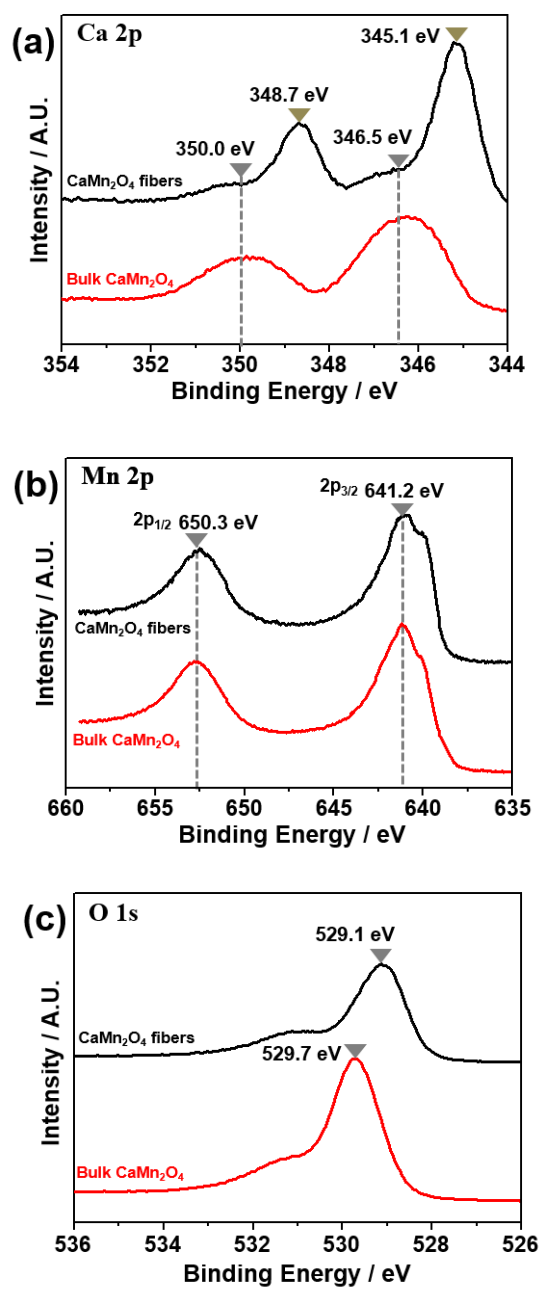

**Figure S19.** XPS spectra of Ca 2p, Mn 2p, and O 1s of  $\text{CaMn}_2\text{O}_4$  fibers and Bulk  $\text{CaMn}_2\text{O}_4$ .
